# Supplementary material for: A synergistic ZnO/FAPbBr 3 nanocrystal n–n heterojunction for low-bias, fast, broadband photodetection and memristive applications
Source: Royal Society of Chemistry journal article supplement (doi:10.1039/d5nr04337a), 2025-12-29
Supplement: d5nr04337a1.pdf [file d5nr04337a1.pdf]

## Supplementary Information

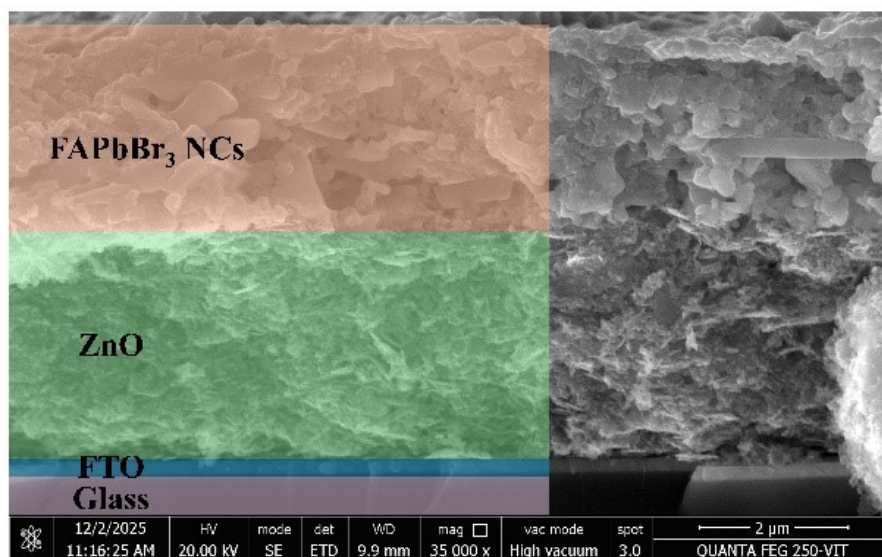

Fig. S1: Cross-sectional SEM analysis of the device

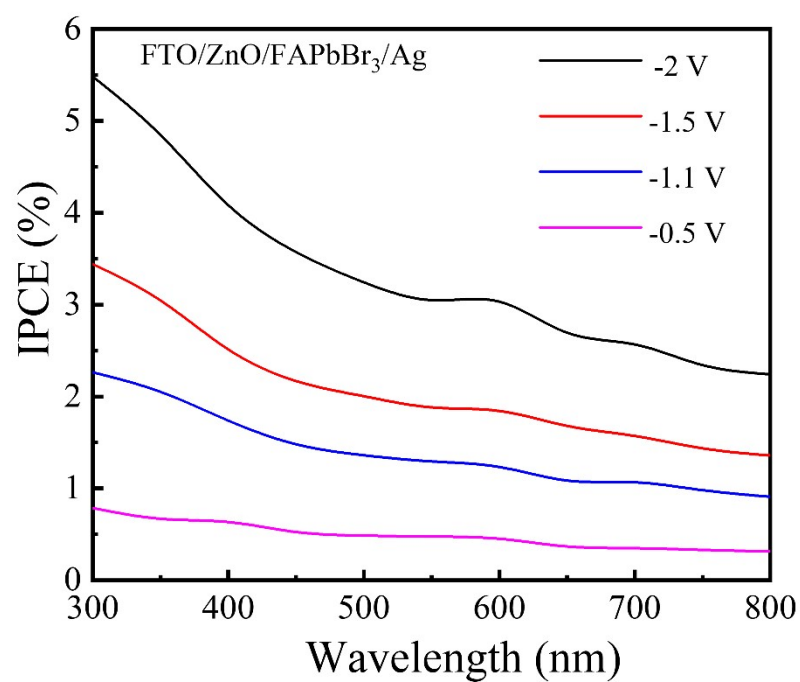

Fig. S2: Spectral response of the device (FTO/ZnO/FAPbBr<sub>3</sub>/Ag)

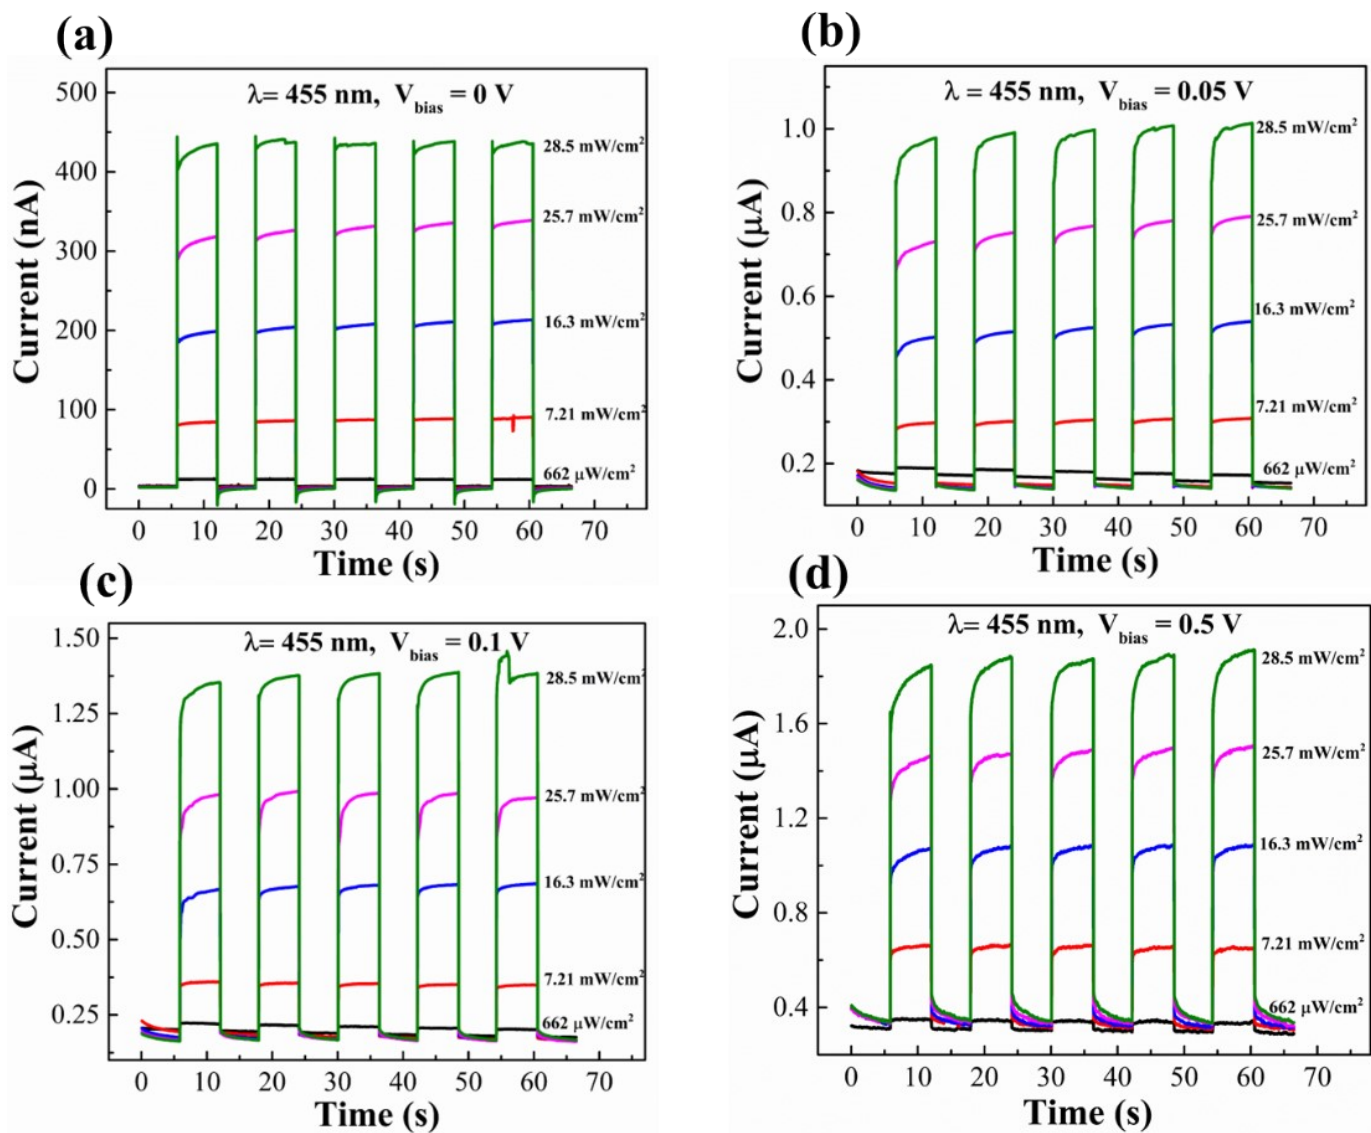

Fig. S3: Time-dependent photocurrent of  $\text{FTO}/\text{ZnO}/\text{FAPbBr}_3/\text{Ag}$  with different intensities at low biasing voltage of (a) 0 V (b) 0.05 V (c) 0.1 V (d) 0.5 V at 455 nm

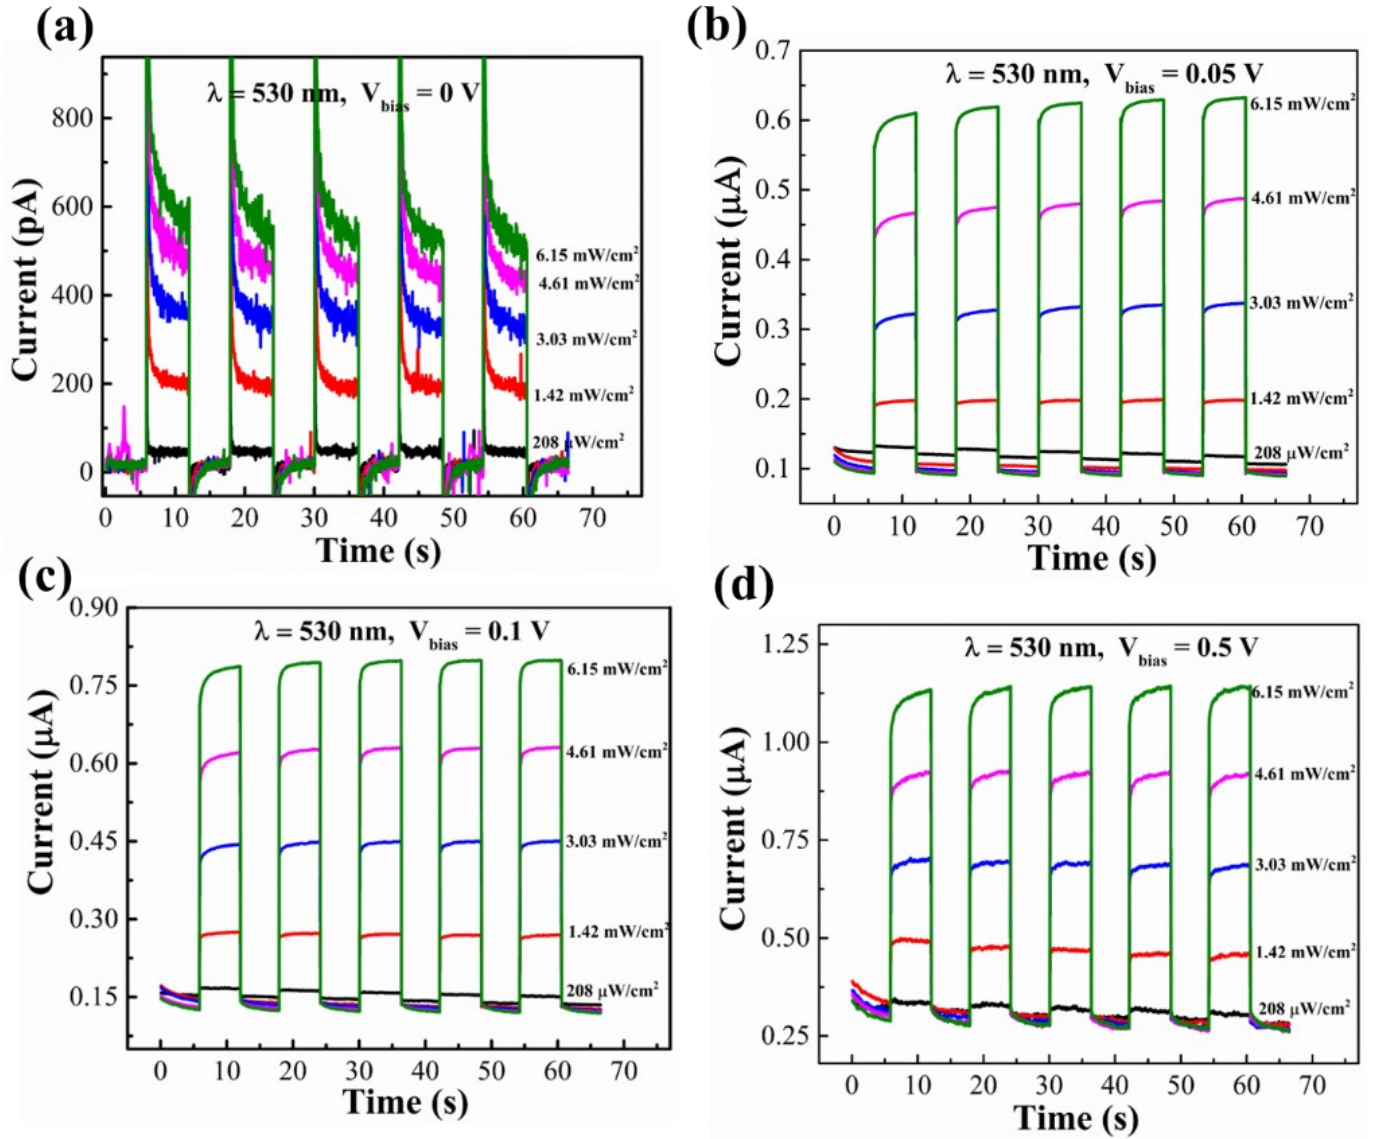

Fig. S4: Time-dependent photocurrent of  $\text{FTO}/\text{ZnO}/\text{FAPbBr}_3/\text{Ag}$  with different intensities at low biasing voltage of (a) 0 V (b) 0.05 V (c) 0.1 V (d) 0.5 V at 530 nm
